# Supplementary material
Source: Copernicus journal article supplement (doi:10.5194/egusphere-2026-1265)
Supplement: Supplementary file [file egusphere-2026-1265-RC1-supplement.pdf]

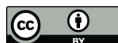

## 17 **Abstract**

18       Runoff threshold behavior is widely reported in event-based hydrological studies, but its  
19 interpretation and cross-catchment comparability remain unresolved due to variations in  
20 threshold metrics and values across climates, landscape structures, and observational focuses.  
21 This study synthesizes reported storm-runoff thresholds from experimental catchments  
22 worldwide by compiling the indicators used to detect nonlinearity, the dominant runoff  
23 generation mechanisms, their observed transition pathways under increasing wetness, and  
24 recurrent soil–geology fingerprints. Across mechanisms and climates, thresholds are identified  
25 using diverse (and often non-standardized) rainfall-based, state-based, and composite indicators.  
26 However, antecedent and within-event state variables (e.g., soil moisture, catchment storage,  
27 groundwater level) consistently provide better explanations for nonlinear runoff responses than  
28 rainfall metrics alone, indicating that threshold behavior is primarily controlled by the state of  
29 the catchment but is triggered by rainfall. Subsurface- and saturation-related mechanisms  
30 dominate the reported cases, particularly in humid environments. When mechanism shifts are  
31 explicitly documented, responses show a strong directional organization with increasing wetness,  
32 typically evolving from infiltration-excess overland flow to saturation-excess overland flow, and  
33 then to subsurface or groundwater-dominated pathways. Soil–geology network analysis further  
34 reveals that each dominant mechanism is associated with recurring combinations of soil depth,  
35 texture, permeability contrasts, lithology, and geological structure, forming structural  
36 fingerprints that regulate connectivity development. Overall, runoff thresholds are best  
37 understood as markers of hydrologic connectivity transitions within structurally constrained  
38 landscapes, rather than fixed rainfall exceedances. We propose a connectivity-based conceptual  
39 framework linking rainfall forcing, evolving states, structural controls, and mechanism  
40 transitions to support cross-catchment comparison, guide future observations, and improve the  
41 representation of nonlinear runoff responses in hydrological models.

42 **Keywords:** Runoff thresholds; Hydrologic connectivity; Soil–geology controls; Transition



## 43 1. Introduction

44 Storm runoff generation often exhibits strong nonlinearity and threshold behavior, where  
45 small changes in rainfall or antecedent wetness can trigger disproportionate increases in runoff.  
46 Numerous event-based studies have shown that similar storms may generate vastly different  
47 runoff outcomes depending on catchment wetness, storage conditions, and subsurface flow  
48 activation (Blume and Van Meerveld, 2015; Penna et al., 2011; Sidle et al., 2000; Tromp-van  
49 Meerveld and McDonnell, 2006a). This nonlinear behavior challenges traditional interpretations  
50 based on rainfall magnitude, highlighting the state-dependent nature of storm runoff, with  
51 rainfall merely acting as a trigger.

52 Subsequent advances shifted focus from fixed rainfall thresholds to state-dependent  
53 activation of hydrologic connectivity. Fill-and-spill concepts emphasized the episodic activation  
54 and coupling of subsurface and depressional storage once critical wetness thresholds are  
55 exceeded (Green and Crumpton, 2023; Jehn et al., 2021; McDonnell, 2013), while hydrologic  
56 connectivity theory framed runoff response as an emergent outcome of progressively coupled  
57 hillslopes, soils, groundwater, and channels (Blume and Meerveld, 2015; Fu et al., 2013;  
58 McDonnell, 2013). Connectivity- and storage-based frameworks further demonstrated that  
59 threshold-like runoff behavior emerges when incremental rainfall leads to disproportionate  
60 increases in internal hydrologic connectivity and flow transmission (Ares et al., 2020; von  
61 Freyberg et al., 2014; McGuire and McDonnell, 2010; Wilson et al., 2017; Zimmermann et al.,  
62 2014). Despite these advances, the question remains: why do similar storms generate  
63 fundamentally different runoff responses across events and catchments?

64 Despite conceptual progress, challenges remain in synthesizing storm runoff nonlinearity  
65 across catchments. Threshold behavior marked by abrupt runoff increases or shifts in dominant  
66 flow pathways has been robustly documented for infiltration-excess overland flow (Deng et al.,  
67 2024; Kampf et al., 2018; Lana-Renault et al., 2013; Ross et al., 2021)), saturation-excess  
68 overland flow (Mentzafou et al., 2023; Ross et al., 2021; Steenhuis et al., 2013; Wang et al.,  
69 2022b), subsurface stormflow (Kirchner, 2024; Lee and Kim, 2020; Sidle et al., 2000; Wang et al.,  
70 2022a), and shallow groundwater-dominated responses (Cui et al., 2024; Gao et al., 2024;  
71 Graeff et al., 2009; Scaife et al., 2020). However, while threshold responses are well recognized,  
72 a comprehensive cross-mechanism synthesis explaining how differences in storage states,



73 connectivity structures, and dominant pathways lead to contrasting runoff responses under  
74 similar storm conditions remains lacking 

75       Recent comparative studies often focus on whether specific runoff generation mechanisms  
76 occur under particular climatic or landscape conditions (McMillan et al., 2025), or on statistical  
77 associations between climate, vegetation, and runoff behavior (Chappell et al., 2017; Douinot et  
78 al., 2022; Lana-Renault et al., 2013; Mirus and Loague, 2013; Steenhuis et al., 2013). While such  
79 studies have advanced our understanding of dominant mechanisms and climatic controls, three  
80 key gaps remain. First, dominant runoff mechanisms are often treated as static catchment  
81 attributes, yet evidence shows that multiple mechanisms can coexist and shift dynamically with  
82 antecedent wetness and event progression (Cain et al., 2022; Martínez-Carreras et al., 2016;  
83 Penna et al., 2011; Ruggenthaler et al., 2015; Saffarpour et al., 2016; Sidle et al., 2000). Few  
84 studies have examined how these mechanisms transition across wetness gradients in a cross-  
85 catchment framework. Second, runoff thresholds are identified using heterogeneous indicators—  
86 ranging from rainfall metrics to soil moisture, storage, groundwater level, and composite  
87 indices—but it remains unclear under which conditions these indicators are comparable or  
88 transferable across catchments (Mirus and Loague, 2013; Scaife et al., 2020). Third, although  
89 soil and geological properties are widely acknowledged as fundamental controls on runoff  
90 generation, their influence is often discussed qualitatively, with few studies quantitatively  
91 assessing whether distinct runoff mechanisms are associated with recurring soil–geological  
92 attributes that form structural "fingerprints" governing connectivity development (James and  
93 Roulet, 2007; McGuire and McDonnell, 2010; Mirus and Loague, 2013; Scaife et al., 2020).

94       These limitations hinder a unified, process-oriented understanding of runoff threshold  
95 behavior across catchments. While many studies have examined threshold responses or described  
96 runoff generation mechanisms, the explicit integration of threshold indicators, dominant  
97 mechanisms, their transitions, and soil–geological context remains rare. To address these gaps,  
98 this study conducts a global synthesis of nonlinear and threshold storm runoff behavior across a  
99 large set of experimental catchments from arid to humid regions. Rather than focusing solely on  
100 mechanism occurrence or isolated threshold metrics, we explicitly link threshold indicators,  
101 dominant runoff generation mechanisms, their dynamic transitions, and soil–geological context  
102 within a unified analytical framework.



103

104 Specifically, we address the following questions:

105 1. Is there a transferable rainfall–wetness indicator that consistently captures storm runoff  
106 regime shifts beyond rainfall-only metrics?

107 2. Do dominant runoff generation mechanisms follow systematic and directional evolution  
108 pathways as catchment wetness increases?

109 3. Do observed mechanism transitions reflect a coherent pattern of progressively  
110 strengthening hydrologic connectivity?

111 4. Are runoff mechanisms associated with recurrent soil–geological combinations that  
112 systematically shape connectivity development and threshold behavior?

113 By integrating event-scale thresholds with mechanism dynamics, connectivity evolution,  
114 and structural context, this study aims to advance a process-based and connectivity-oriented  
115 interpretation of runoff thresholds. Rather than seeking universal threshold values, which vary  
116 across catchments, we focus on recurring trigger–state–structure combinations that govern  
117 nonlinear runoff responses across diverse hydrological settings.

118 ~~These limitations hinder a unified, process-oriented understanding of runoff threshold~~  
119 ~~behavior across catchments. Despite numerous studies examining threshold responses and runoff~~  
120 ~~generation mechanisms, the integration of threshold indicators, dominant mechanisms, their~~  
121 ~~transitions, and the soil–geological context remains rare. To address these gaps, this study~~  
122 ~~conducts a global synthesis of nonlinear and threshold storm runoff behavior across a large set of~~  
123 ~~well-instrumented experimental catchments, spanning arid to humid regions. Rather than~~  
124 ~~focusing solely on mechanism occurrence or isolated threshold metrics, we explicitly link~~  
125 ~~threshold indicators, dominant runoff mechanisms, their dynamic transitions, and soil–geological~~  
126 ~~context within a unified analytical framework.~~

## 127 **2. Data and Methods**

### 128 **2.1 Literature synthesis and catchment database**

129 To systematically investigate nonlinear and threshold-driven runoff generation under storm  
130 conditions, we conducted a comprehensive synthesis of the international literature on rainfall–  
131 runoff nonlinearity, ~~abrupt hydrological response shifts~~, and runoff threshold behavior. The



132 review targeted experimental, observational, and process-based studies that explicitly examined  
133 stormflow generation processes across a wide range of climatic and physiographic settings.

134 We searched peer-reviewed literature using Web of Science Core Collection and Scopus,  
135 supplemented by Google Scholar for catchment-specific follow-up, to identify studies reporting  
136 event-scale nonlinear or threshold storm-runoff behavior. The search combined terms related to  
137 nonlinearity, thresholds, and runoff generation, including "runoff threshold," "threshold  
138 behavior," "nonlinear runoff," "rainfall-runoff nonlinearity," and "stormflow generation." These  
139 terms were applied to the full text of articles, not just titles, ensuring a comprehensive search.  
140 Over 200 articles were initially screened based on title/abstract and full text.

141 Studies were retained if they: (i) provided well-documented storm-event observations (e.g.,  
142 ~~rainfall and runoff time series, hydrograph/hysteresis analyses, soil moisture or groundwater~~  
143 ~~dynamics, tracers/isotopes, or similar process evidence~~); and (ii) included an explicit  
144 interpretation of nonlinear or threshold-like runoff behavior, along with the associated dominant  
145 runoff generation mechanism(s). Studies focusing solely on linear rainfall-runoff relationships or  
146 long-term water balance analyses, without event-scale threshold interpretation, were excluded.  
147 Each study was thoroughly reviewed to ensure it met these criteria. We extracted data for 176  
148 catchments from the screened literature. Thirty-nine ~~catchments~~ based solely on model  
149 simulations, without direct field observations, were excluded. The final dataset includes 138  
150 catchments (shown in Fig. 1 and Table A1) from humid, semi-humid, semi-arid, and ~~one~~ arid  
151 climate, ~~spanning~~ diverse vegetation, soil, and geological settings, providing broad hydroclimatic  
152 coverage while maintaining a focus on event-scale runoff processes and nonlinear behavior .

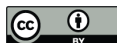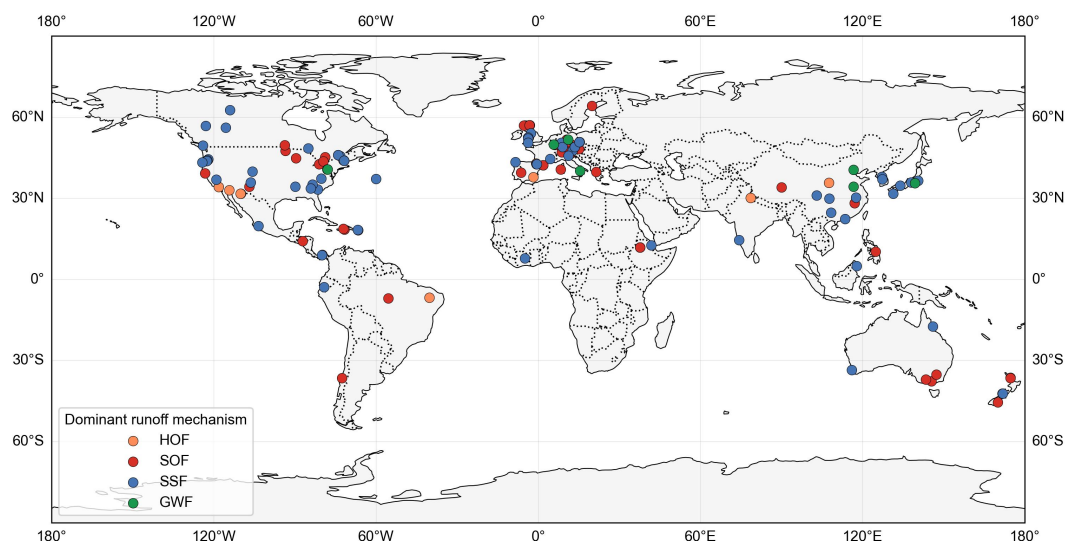

153

154 **Figure 1.** Global distribution of study catchments categorized by dominant runoff generation  
155 mechanisms. Colored symbols indicate the dominant or combined runoff generation mechanisms  
156 reported for each catchment, including infiltration-excess overland flow (HOF), saturation-  
157 excess overland flow (SOF), subsurface stormflow (SSF), groundwater-dominated flow (GWF),  
158 and their combinations.

159 ~~Catchments were classified based on the dominant or combined runoff mechanisms~~  
160 ~~reported in the original studies, including HOF, SOF, SSF, GWF, and their combinations. GWF~~  
161 ~~refers to shallow groundwater responses within weathered bedrock or fractured regolith that~~  
162 ~~contribute to event-scale stormflow, not regional confined aquifers responsible for long-term~~  
163 ~~baseflow.~~

164 For each catchment, we extracted information on:

- 165 (i) Aridity category and vegetation type;
  - 166 (ii) Soil properties, including depth, texture, and permeability;
  - 167 (iii) Geological and hydrogeological characteristics; and
  - 168 (iv) Reported dominant runoff generation mechanisms, along with the state variables and
- 169 indicators used to identify nonlinear or threshold runoff behavior.

## 170 2.2 Classification of runoff generation mechanisms

171 Runoff generation mechanisms were classified based on established process-based  
172 frameworks that distinguish surface- and subsurface-dominated stormflow pathways. Each



173 catchment was assigned one or more dominant mechanisms, such as HOF, SOF, SSF, and GWF,  
174 based on reported stormflow responses. GWF refers to shallow groundwater responses within  
175 weathered bedrock or fractured regolith, contributing to event-scale stormflow rather than long-  
176 term baseflow.

177 Classification reflects the mechanism that primarily controls stormflow during events  
178 exhibiting nonlinear or threshold behavior. Dominance refers to the mechanism contributing  
179 most strongly to runoff generation once threshold conditions are exceeded, rather than implying  
180 exclusive operation of a single process. Where studies reported multiple coexisting or  
181 sequentially activated mechanisms, composite categories (e.g., HOF + SOF, SOF + SSF, SSF +  
182 GWF) were used.

183 Mechanism assignments were strictly based on process-based evidence from the original  
184 studies, such as hydrograph characteristics, runoff coefficients, soil moisture and groundwater  
185 dynamics, tracer/isotope observations, and shifts in flow pathways. No reinterpretation of the  
186 original authors' conclusions was applied.

### 187 **2.3 Definition of runoff regime shifts and threshold conditions**

188 Runoff regime shifts are defined as abrupt, nonlinear changes in stormflow response that  
189 reflect transitions in dominant runoff generation processes or hydrological connectivity, rather  
190 than proportional increases in rainfall input alone. A regime shift was identified when one or  
191 more of the following conditions were reported during storm events:

- 192 (i) a distinct breakpoint in the rainfall–runoff relationship;
- 193 (ii) a disproportionate increase in runoff relative to rainfall input;
- 194 (iii) a documented transition in dominant runoff generation mechanism; or
- 195 (iv) enhanced hydrological connectivity, such as hillslope–channel coupling, activation of  
196 soil–bedrock interfaces, or rapid groundwater table rise.

197 Threshold behavior was interpreted as the joint outcome of event-scale rainfall forcing and  
198 catchment hydrological state. Accordingly, rainfall characteristics (e.g., amount, intensity,  
199 duration) were treated as triggering conditions, while antecedent and within-event state  
200 variables—commonly antecedent soil water content (ASW), antecedent moisture condition  
201 (AMC), soil water content (SWC), and groundwater level (GWL)—were used as indicators  
202 modulating the emergence of nonlinear responses. ~~Structural catchment properties (e.g., soil~~



~~203 texture and depth, permeability contrasts, bedrock characteristics) were not treated as threshold~~  
~~204 indicators but as longer-term controls shaping dominant runoff mechanisms, and were analyzed~~  
~~205 separately in Section 3.5.~~

## 206 **2.4 Climate and vegetation classification**

207 Catchments were grouped by climatic wetness and dominant vegetation type to assess how  
208 dominant runoff generation mechanisms and regime shifts vary across environmental ~~gradients.~~  
~~209 These classifications provide~~ contextual interpretation of mechanism occurrence and transition  
210 patterns, ~~not as direct explanatory variables~~ 

211 ~~Climatic wetness was~~ classified into humid, semi-humid, semi-arid, and arid categories  
212 based on climate-type descriptions and mean annual precipitation from the source studies. As  
213 potential evapotranspiration data was rarely available, a uniform aridity index ( $AI = P/PET$ ) was  
214 not calculated. Instead, classification combined Köppen climate data (where available) with  
215 reported precipitation ranges and qualitative aridity descriptions for consistent cross-catchment  
216 categorization. Vegetation types were classified as forest, grassland, cropland, shrubland, or  
217 mixed vegetation based on study descriptions.

## 218 **2.5 Soil–geology keyword co-occurrence network**

219 To examine recurring associations between dominant runoff generation mechanisms and  
220 subsurface characteristics, we conducted a soil–geology keyword co-occurrence network  
221 analysis. This analysis identifies combinations of soil and geological attributes that frequently  
222 co-occur with specific runoff mechanisms across catchments. 

223 For each catchment, soil- and geology-related descriptors from the literature were extracted  
224 and standardized into a consistent keyword set, including soil depth, texture, permeability,  
225 bedrock type, and structural features like fracturing. Only attributes explicitly linked to runoff  
226 generation (e.g., soil depth, texture, permeability contrasts, lithology) were included. ~~Implicit~~  
~~227 interpretations or inferred characteristics not directly reported were excluded to minimize~~  
228 ~~subjectivity.~~ 

229 To ensure consistency across studies, extracted descriptors were standardized using a  
230 synonym normalization table (Table S2), which merged similar terms into unified descriptors  
231 (e.g., “shallow regolith,” “thin soils,” and “shallow soils” were combined as “shallow soil”).  
232 This normalization focused on preserving the hydrological meaning while reducing linguistic



233 variability. Keyword extraction and standardization were independently reviewed by two  
234 researchers to ensure consistency. Discrepancies were resolved through discussion and reference  
235 to original study descriptions.

236 The resulting standardized set of descriptors was used to construct soil–geology co-  
237 occurrence networks, linking dominant runoff generation mechanisms to recurring soil and  
238 geological attributes ~~across catchments~~. In these networks, nodes represent individual soil or  
239 geological keywords, and edges represent their co-occurrence within the same catchment. To  
240 increase robustness and reduce the influence of isolated case studies, only descriptor pairs  
241 occurring in at least two independent catchments were retained. Edge thickness reflects the  
242 frequency of co-occurrence and was used to identify dominant soil–geology associations for each  
243 runoff generation mechanism. Sensitivity tests with stricter co-occurrence thresholds ( $\geq 3$   
244 catchments) showed similar structural clusters, indicating that the identified fingerprints are not  
245 driven by isolated cases.

### 246 3. Results

#### 247 3.1 Reported state variables and indicators of runoff threshold behavior

248 ~~This section summarizes how nonlinear runoff threshold behavior has been reported in the~~  
249 ~~reviewed literature, focusing on the state variables and indicators used, rather than on process~~  
250 ~~interpretation.~~

251 ~~The global distribution of the reviewed catchments and their reported dominant runoff~~  
252 ~~generation mechanisms is shown in Fig. 1. To facilitate comparison across mechanisms, Fig. 2~~  
253 ~~synthesizes state variables and threshold indicators for four dominant runoff generation~~  
254 ~~mechanisms HOF, SOF, SSF, and GWF excluding composite mechanisms. In Fig. 2,~~  
255 ~~dominant runoff mechanisms are linked to reported state variables and indicators of nonlinear~~  
256 ~~runoff behavior. The width of each flow represents the number of studies reporting a given~~  
257 ~~mechanism variable or mechanism indicator combination.~~

258 A wide range of state variables has been used to characterize hydrological conditions  
259 associated with nonlinear runoff responses. These include antecedent soil moisture, antecedent  
260 moisture condition, soil or catchment storage state, groundwater level, and coupled soil–

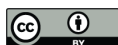

261 groundwater metrics. The relative frequency of these variables varies among dominant runoff  
 262 mechanisms, as illustrated in Fig. 2.

**Mechanism-dependent expression of state variables and threshold reporting**

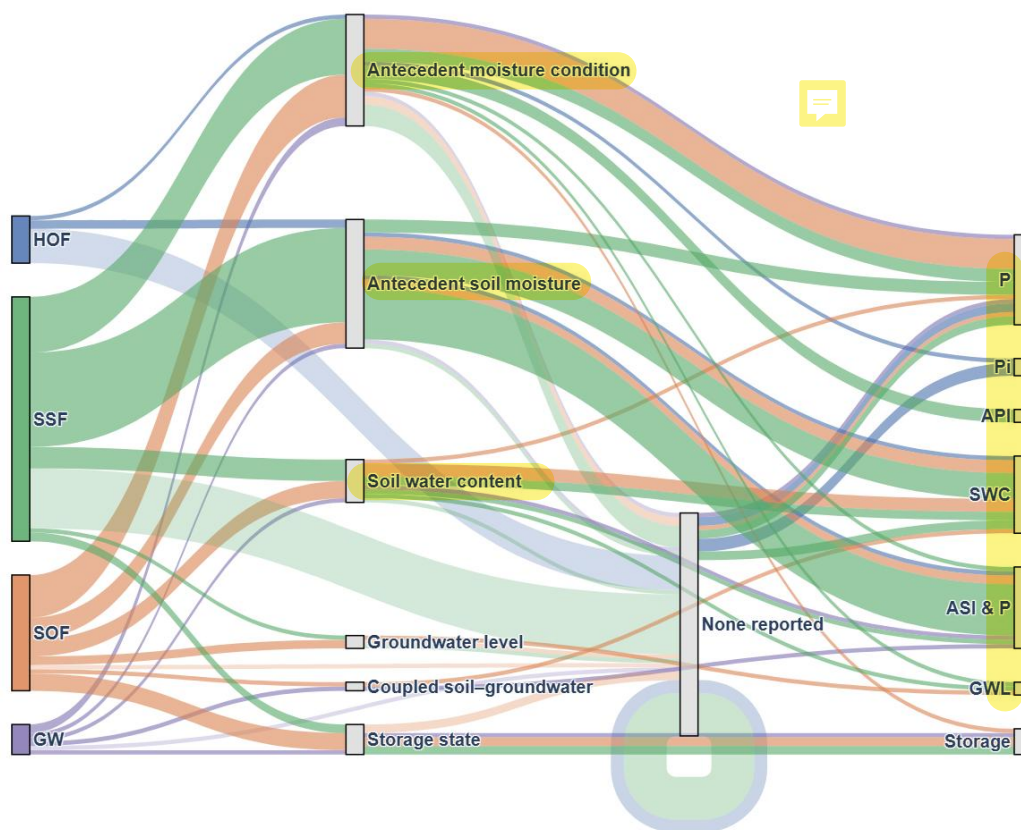

263

264 **Figure 2.** Sankey diagram summarizing reported trigger–state indicators used to identify  
 265 nonlinear runoff threshold behavior across dominant runoff generation mechanisms. Nodes on  
 266 the left represent dominant runoff mechanisms, the middle nodes represent state variables, and  
 267 the right nodes represent indicators used to identify threshold behavior. Flow bands connect  
 268 mechanisms, state variables, and indicators, with band width proportional to the number of  
 269 studies reporting each combination. The node "None reported" indicates studies that described  
 270 nonlinear runoff responses without specifying an explicit threshold indicator.

271 Indicators used to identify nonlinear runoff behavior also differ substantially across studies.  
 272 These include rainfall-based variables such as total event rainfall and rainfall intensity; state-  
 273 based variables like soil water content, groundwater level, or storage metrics; and composite  
 274 indicators combining rainfall and antecedent wetness information. In some studies, no explicit



275 quantitative indicator of nonlinear behavior was reported, with threshold behavior identified  
 276 qualitatively.

277 Distinct reporting patterns emerge across mechanisms. Studies classified as HOF-dominated  
 278 more frequently report rainfall-based indicators, whereas studies dominated by SOF, SSF, and  
 279 GWF tend to report antecedent wetness, storage-related variables, or groundwater conditions.  
 280 Composite indicators are reported across multiple mechanisms. Overall, Fig. 2 highlights  
 281 ~~substantial variability in the variables and indicators used to characterize runoff threshold~~  
 282 ~~behavior.~~

### 283 3.2 Frequency and proportional contribution of dominant runoff generation mechanisms

284 Figure 3 summarizes the absolute frequency and relative contribution of dominant runoff  
 285 generation mechanisms across the reviewed catchments. Panel (a) shows the number of  
 286 catchments associated with each mechanism, while panel (b) presents their proportional  
 287 contribution to the dataset. Across all reviewed studies, subsurface-related mechanisms are more  
 288 frequently reported. SSF is the most common mechanism, accounting for 41.0% of all  
 289 catchments, followed by combined SOF–SSF mechanisms (20.9%) and SOF alone (19.4%).  
 290 Together, SSF, SOF, and their combinations represent the majority of reported cases.

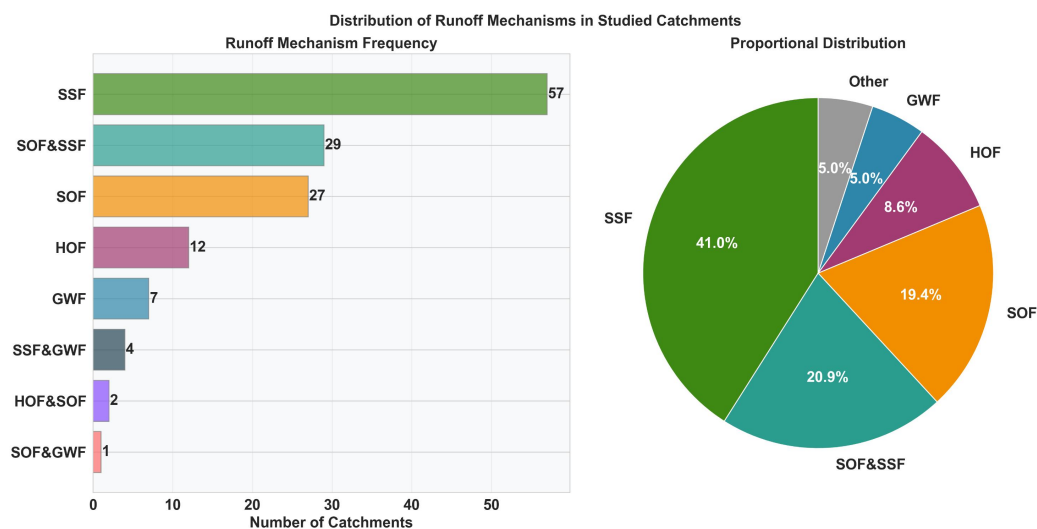

291



292 **Figure 3.** Frequency and ~~proportional contribution~~ of dominant runoff generation mechanisms  
 293 reported in the reviewed ~~catchments~~. The left panel shows the number of catchments classified  
 294 under each dominant runoff mechanism or reported mechanism combination, based on the  
 295 primary interpretation in the original studies. The right panel illustrates the proportional  
 296 contribution of each mechanism category to the overall dataset.

297 In contrast, HOF accounts for less than 10% of the reviewed catchments. GWF and  
 298 categories involving groundwater represent a smaller fraction of the dataset.

### 299 3.3 Aridity- and vegetation-specific partitioning of dominant runoff generation mechanisms

300 Figure 4 summarizes the distribution of reported dominant runoff generation mechanisms  
 301 across aridity and vegetation categories. Stacked bar charts show the number of catchments with  
 302 each dominant mechanism within four aridity classes (humid, semi-humid, semi-arid, and arid)  
 303 and across major vegetation types. Single and combined mechanisms are shown separately.

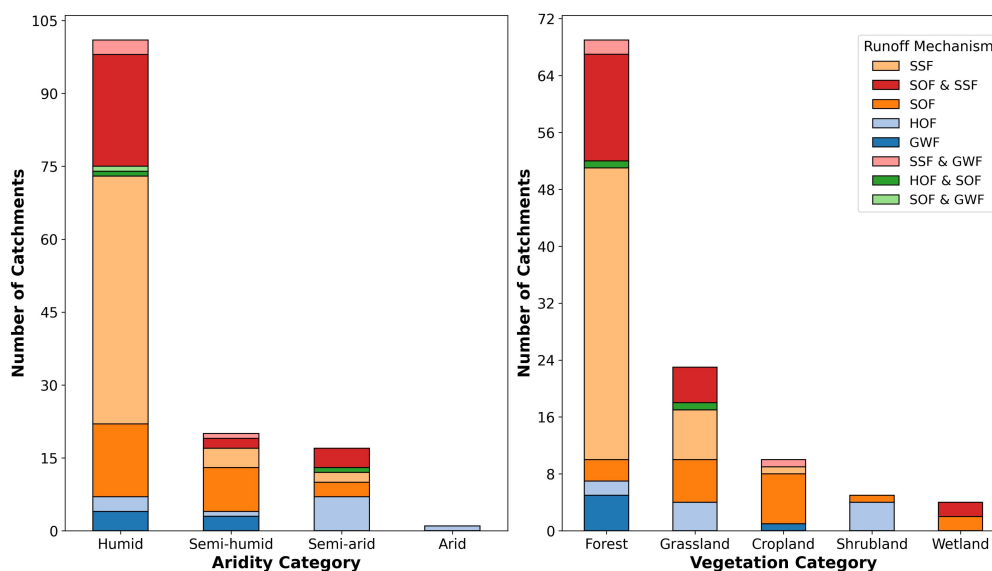

304

305 **Figure 4.** Distribution of dominant runoff generation mechanisms across aridity and vegetation  
 306 categories.

307 Across the aridity gradient (Fig. 4a), humid catchments account for the majority of  
 308 observations and exhibit the widest range of reported runoff generation mechanisms. SSF  
 309 represents the largest share, followed by SOF and combined SOF–SSF mechanisms.  
 310 Groundwater-related mechanisms (GWF and SSF–GWF) are almost exclusively reported in  
 311 humid catchments. Semi-humid catchments are fewer and are dominated by SOF, with additional



312 contributions from SSF and GWF. In semi-arid catchments, the total number of reported systems  
 313 is smaller; SSF and SOF remain, but HOF constitutes a larger proportion relative to wetter  
 314 classes. Only one arid catchment is included, classified as HOF-dominated.

315 Mechanism distributions also vary across vegetation types (Fig. 4b). Forested catchments  
 316 are the most frequent, representing a mix of SSF, SOF, SOF–SSF combinations, and  
 317 groundwater-related mechanisms. Grassland catchments show a mixture of SSF, SOF, and HOF.  
 318 Cropland catchments, less frequently reported, are mainly associated with SOF. Shrubland and  
 319 wetland catchments are underrepresented; shrubland catchments are mostly HOF-dominated,  
 320 while wetland catchments are mostly SOF and SOF–SSF.

321 Figure 5 further summarizes the aridity composition of the five most frequently reported  
 322 dominant runoff generation mechanisms (SSF, SOF–SSF, SOF, HOF, and GWF), expressed as  
 323 percentages relative to the total number of catchments reporting each mechanism.

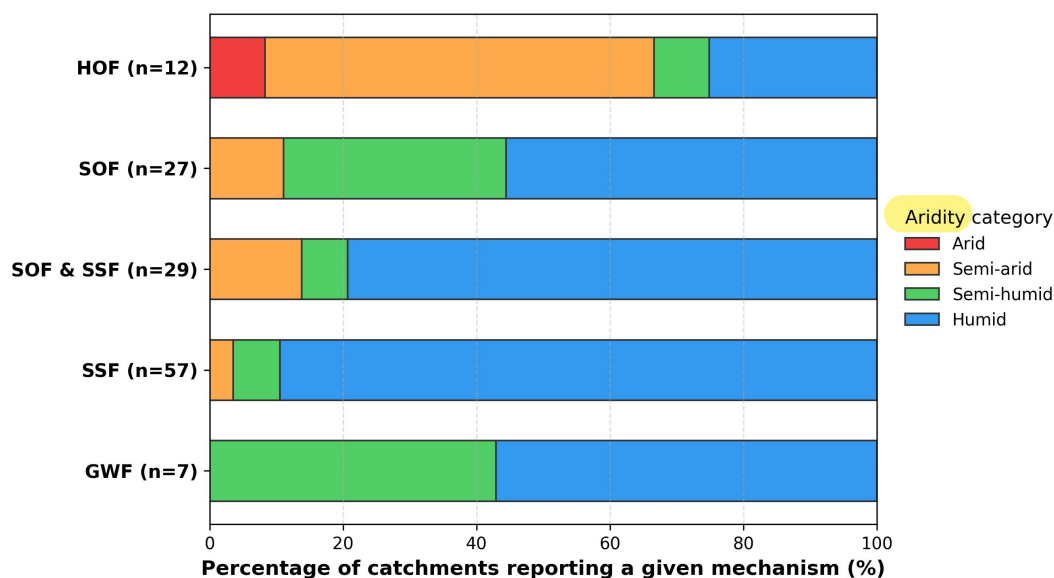

324

325 **Figure 5.** Climatic composition of dominant runoff generation mechanisms (percentages relative  
 326 to mechanism-specific sample size). Percentages are calculated relative to the total number of  
 327 catchments reporting each mechanism, such that each bar sums to 100%.

328 SSF- and SOF–SSF-dominated catchments are primarily found in humid climates, with  
 329 smaller contributions from semi-humid and semi-arid regions. SOF-dominated catchments are  
 330 distributed across humid and semi-humid climates, with some occurrences in semi-arid



331 environments. HOF-dominated catchments are found across all aridity classes, with the largest  
332 proportion in semi-arid climates, followed by humid catchments. GWF-dominated catchments  
333 are restricted to humid and semi-humid climates, with no occurrences in semi-arid or arid  
334 regions.

### 335 3.4 Transitions of dominant runoff generation mechanisms under increasing wetness

336 We synthesized evidence from 23 experimental catchments where changes in dominant  
337 runoff generation mechanisms were explicitly reported during storm events or across event  
338 sequences under increasing catchment wetness. These catchments provide direct observations of  
339 mechanism transitions under evolving hydrological conditions.

340 Figure 6 illustrates the observed transition pathways among dominant runoff generation  
341 mechanisms. The most commonly reported initial dominant mechanisms are HOF (12  
342 catchments) and SOF (9 catchments), while fewer catchments exhibit SSF or GWF as the initial  
343 mechanism. Node size reflects the total number of catchments with a given initial mechanism,  
344 and flow bands returning to the same node indicate instances where the dominant mechanism  
345 remains unchanged. These self-links, which may appear as circular loops in the Sankey diagram,  
346 represent cases where the mechanism did not change across the wetness gradient.

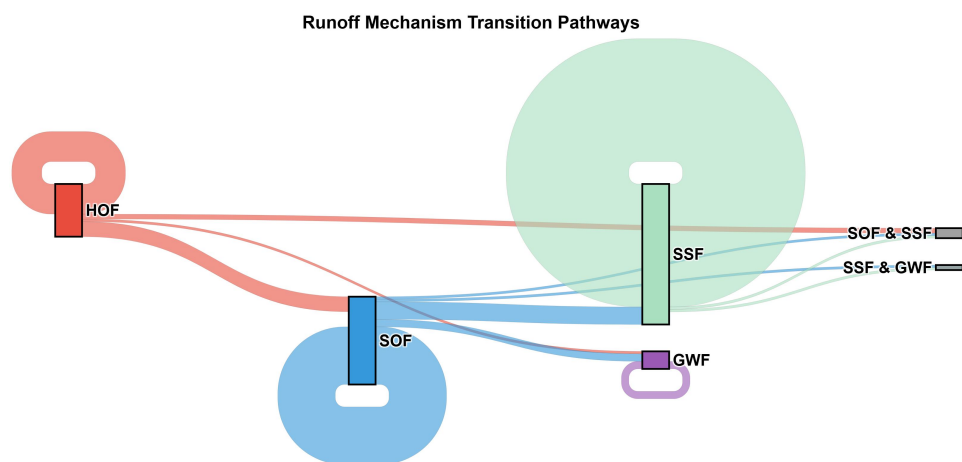

347



348 **Figure 6.** Sankey diagram illustrating observed transition pathways of dominant runoff  
349 generation mechanisms ~~under~~ increasing wetness. Rectangular nodes represent runoff generation  
350 mechanisms, with node size reflecting the total number of catchments reporting each mechanism.  
351 Directed flow bands represent observed transitions between mechanisms as wetness increases,  
352 with band width proportional to the number of catchments exhibiting each transition. Flow bands  
353 returning to the same node indicate cases where the dominant mechanism remains unchanged.

354 ~~As wetness increases, multiple transition pathways are observed.~~ For catchments initially  
355 dominated by HOF, transitions typically occur toward SOF, combined SOF–SSF responses, and  
356 less frequently, groundwater-dominated flow. Catchments initially dominated by SOF transition  
357 to SSF, GWF, and mixed SOF–SSF and SSF–GWF responses. Transitions originating from SSF  
358 are less frequent but include shifts toward ~~combined subsurface and groundwater-dominated~~  
359 ~~mechanisms.~~

360 ~~The conditional structure of these transitions is presented in Fig. 7, which shows transition~~  
361 ~~probabilities based on the number of catchments with a given initial dominant mechanism. For~~  
362 ~~HOF-dominated catchments, transitions to SOF account for approximately 29%, followed by~~  
363 ~~transitions to SOF–SSF (10%) and GWF (5%). For SOF-dominated catchments, the most~~  
364 ~~frequent transition is toward SSF (20%), with additional transitions to GWF (9%), SOF–SSF~~  
365 ~~(3%), and SSF–GWF (3%). For SSF-dominated catchments, transitions include shifts to SOF–~~  
366 ~~SSF (4%) and SSF–GWF (2%).~~

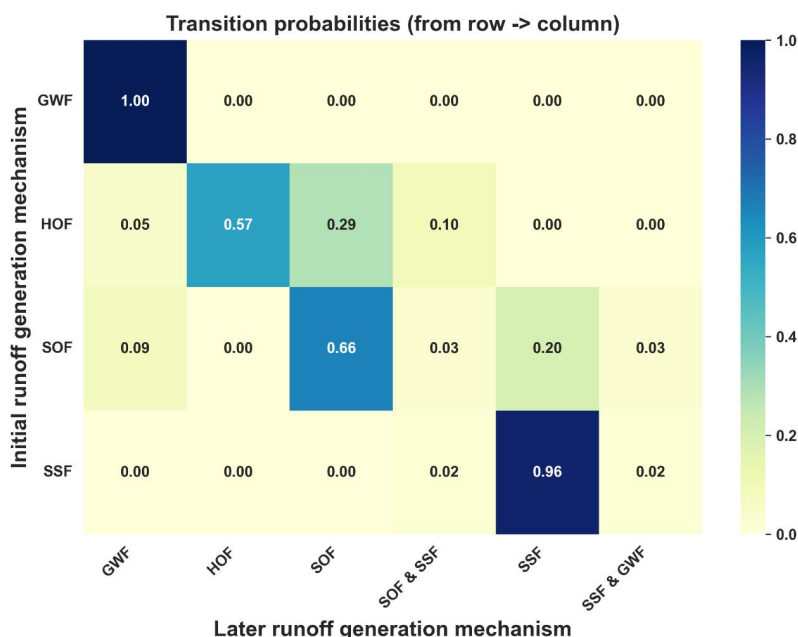

367

368 **Figure 7.** Conditional transition probabilities between dominant runoff generation mechanisms  
 369 under increasing wetness. Values represent the proportion of catchments with a given initial  
 370 mechanism (rows) that transitioned to each subsequent mechanism (columns).

371 Across the compiled catchments, transitions are predominantly from surface-dominated  
 372 mechanisms to subsurface- and groundwater-dominated mechanisms. Reverse transitions, from  
 373 subsurface or groundwater-dominated flow to surface-dominated runoff, are rarely reported. To  
 374 evaluate whether the observed directional tendency differs from random reorganization, we  
 375 compared the empirical transition matrix with a null model assuming equal transition  
 376 probabilities. Surface-to-subsurface transitions occurred significantly more frequently than  
 377 expected under the null hypothesis (permutation test,  $p < 0.05$ ).

### 378 3.5 Soil–geology fingerprints of runoff generation mechanisms

379 To characterize the structural environments associated with different dominant runoff  
 380 generation mechanisms, we conducted a soil–geology keyword co-occurrence analysis for 103  
 381 representative catchments, each with a clearly identified dominant mechanism. Descriptors  
 382 related to soil texture, soil structural properties, lithology, and geological structure were  
 383 systematically extracted from the literature and synthesized into four co-occurrence networks



384 (Fig. 8a-d). Link thickness represents the frequency of repeated co-occurrence across  
 385 independent catchments, emphasizing recurrent soil-geology associations rather than site-  
 386 specific attributes.

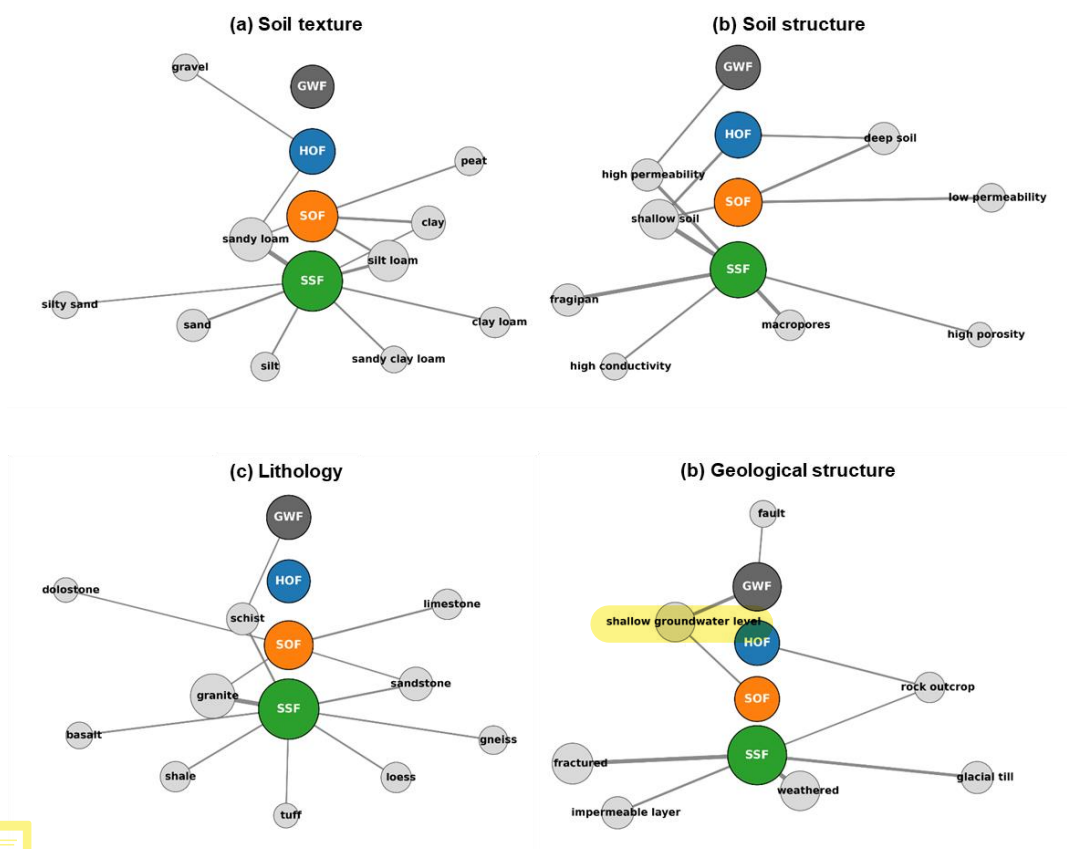

387

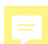

388 **Figure 8.** Soil-geology fingerprints of dominant runoff generation mechanisms. Panels show co-  
 389 occurrence relationships with (a) soil texture, (b) soil structural properties, (c) lithology, and (d)  
 390 geological structure. Colored nodes represent dominant runoff mechanisms—HOF, SOF, SSF,  
 391 and GWF—while gray nodes represent soil or geological keywords extracted from the literature.  
 392 Node size reflects the frequency of occurrence across reviewed catchments, and link thickness  
 393 indicates the number of independent catchments in which a given mechanism and descriptor co-  
 394 occur.

395 Catchments dominated by HOF are associated with a limited set of soil and geological  
 396 descriptors. The most frequent associations include shallow soils, gravel, rock outcrops, and  
 397 coarse surface materials. A smaller number of HOF-dominated catchments are found in areas  
 398 with exceptionally deep soil profiles.



399 ~~SOF exhibits a more distinct and coherent pattern of soil and geological associations. Strong~~  
400 co-occurrence links ~~connect~~ SOF to ~~clay and loam textures, deep soils, and low permeability.~~ It  
401 is also frequently associated with ~~dense lithologies, such as granite, limestone, and dolostone, as~~  
402 well as with shallow groundwater conditions. 

403 SSF has the most diverse co-occurrence structure of the four mechanisms. It is commonly  
404 associated with shallow soils, fragipans, macropores, and high permeability. Additional links  
405 connect SSF to silt loam and sandy loam textures, and to fractured or weathered bedrock types,  
406 including granite and shale. 

407 GWF, while having a more compact but distinct co-occurrence pattern, is most strongly  
408 associated with shallow groundwater levels and structurally conductive geological settings, such  
409 as schist, faults, and fractured formations. In contrast, GWF shows weak and non-specific  
410 associations with soil textures, and soil structural properties ~~are infrequently reported in GWF-~~  
411 ~~dominated catchments.~~

412 Overall, the four co-occurrence networks highlight recurring combinations of soil depth,  
413 texture, permeability, lithology, and geological structure associated with different dominant  
414 runoff generation mechanisms. These associations occupy distinct, though partially overlapping,  
415 regions of the soil–geology attribute space across the reviewed catchments.

## 416 4. Discussion

### 417 4.1 What do runoff thresholds represent across studies?

418 Across the reviewed literature, the term "runoff threshold" is consistently used to describe  
419 nonlinear stormflow responses, yet the synthesis in Section 3.1 reveals that these thresholds are  
420 not defined by a single, universal variable ~~or numeric value~~. Instead, threshold behavior is  
421 identified using a heterogeneous set of indicators, including rainfall-based metrics, hydrologic  
422 state variables, and composite indices combining forcing and antecedent conditions. This  
423 diversity reflects methodological differences and varying ~~conceptualizations~~ of runoff regime  
424 shifts across catchments and hydrologic settings.

425 A key finding is that rainfall alone is insufficient to explain nonlinear runoff responses.  
426 While precipitation acts as a trigger, abrupt runoff increases typically occur only when  
427 catchments approach critical internal states. Accordingly, rainfall-based thresholds often

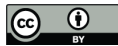

428 ~~correlate~~ with antecedent wetness, soil moisture, or groundwater levels, suggesting that  
429 precipitation primarily triggers events rather than directly controlling regime shifts (Ali et al.,  
430 2015; Ross et al., 2021; Tromp-van Meerveld and McDonnell, 2006a, b).

431 In contrast, thresholds expressed in terms of soil moisture, catchment storage, or  
432 groundwater level better capture the state-dependence of nonlinear runoff behavior. These state  
433 variables ~~indicate the proximity to hydrologic connectivity activation, such as~~ saturation  
434 expansion, lateral subsurface flow initiation, and hillslope–channel coupling (Fu et al., 2013;  
435 McGuire and McDonnell, 2010; Penna et al., 2011). The prominence of state-based indicators  
436 across diverse climates and runoff mechanisms suggests that runoff thresholds are fundamentally  
437 state-controlled, though rainfall-triggered.

438 The use of composite indices highlights the inseparability of forcing and state effects in  
439 empirical studies. Rather than universally transferable threshold variables, these indices serve as  
440 practical proxies for the combined forcing-state conditions under which regime shifts occur.  
441 Their widespread use reflects the challenge of isolating internal states from external forcing in  
442 event-based studies, rather than evidence for a universal hydrologic threshold law.

443 ~~These findings suggest that reported runoff thresholds should not be viewed as fixed,~~  
444 ~~catchment-invariant constants.~~ Though thresholds are not directly comparable in terms of  
445 specific metrics or numeric values, they are conceptually comparable: across environments,  
446 thresholds ~~consistently signify~~ connectivity transitions, where incremental rainfall results in  
447 ~~disproportionate increases in internal~~ connectivity and runoff. Thus, cross-catchment  
448 comparability is found not in the threshold value, but in the connectivity transition it represents.  
449 This perspective reconciles the diversity of threshold indicators and provides a foundation for  
450 global synthesis, highlighting the need to examine how structural attributes influence state  
451 evolution and connectivity development.

452 Based on the global synthesis, two state indicators emerge as the most transferable across  
453 climatic and structural settings: (1) antecedent soil moisture or relative catchment storage,  
454 particularly effective in SOF- and SSF-dominated systems, and (2) groundwater level or water  
455 table depth, which captures hillslope–riparian connectivity in humid and groundwater-influenced  
456 catchments. These indicators ~~perform less consistently in~~ infiltration-excess-dominated systems,  
457 ~~where~~ rainfall intensity often overrides antecedent storage effects. While no universal numeric



458 threshold exists, these state variables provide ~~the most~~ physically interpretable and cross-  
459 catchment comparable proxies of connectivity proximity.

#### 460 **4.2 Why do thresholds differ across mechanisms and catchments?**

461 Differences in runoff threshold behavior across mechanisms and catchments primarily stem  
462 from how hydrologic connectivity develops within structurally constrained landscapes, rather  
463 than differences in rainfall forcing alone. Soil and geological structure define the subsurface  
464 architecture through which water is stored and transmitted, regulating both the rate of  
465 connectivity increase with wetness and the flow pathways activated (Blume and Van Meerveld,  
466 2015; McGuire and McDonnell, 2010).

467 The soil–geology fingerprints identified in Section 3.5 show that dominant runoff  
468 mechanisms occupy distinct regions of structural attribute space. HOF-dominated catchments are  
469 typically characterized by shallow soils, **coarse surface materials**, and **limited storage capacity**  
470 (Kampf et al., 2018; Lana-Renault et al., 2013; Liu et al., 2022; Nanda and Sen, 2021),  
471 conditions that ~~favor rapid infiltration limitation~~ during high-intensity rainfall. SOF, on the other  
472 hand, emerges in settings with deeper, fine-textured soils and **low-permeability substrates** (Birkel  
473 et al., 2017; Camporese et al., 2014; Frei et al., 2010; Meyles et al., 2003; Penna et al., 2010;  
474 Steenhuis et al., 2013), ~~where vertical storage accumulation leads to~~ near-surface saturation and  
475 expansion of connected source areas. SSF and GWF are linked to more complex subsurface  
476 structures, such as permeability contrasts (Graham et al., 2010; Patankou et al., 2004; Wang et al.,  
477 2022a), preferential flow networks (Detty and McGuire, 2010; Haga et al., 2005; Lee and Kim,  
478 2020; Zehe et al., 2007; Zillgens et al., 2007), fractured or weathered bedrock (Birch et al., 2021;  
479 Chappell et al., 2017; Cuomo and Guida, 2016; Nanda and Safeeq, 2023; Sahraei et al., 2020; Ye  
480 et al., 2023), and shallow groundwater tables (Cuomo and Guida, 2016; Gao et al., 2024; Graeff  
481 et al., 2009; Meyles et al., 2003; Scaife et al., 2020), all of which facilitate lateral and vertical  
482 connectivity at depth.

483 These structural differences explain ~~why similar rainfall amounts or antecedent wetness can~~  
484 ~~produce~~ markedly different runoff responses across catchments. A given level of soil moisture or  
485 storage may trigger lateral subsurface pathways in one catchment, while remaining below the  
486 connectivity threshold in another. Structural attributes do not directly prescribe thresholds but  
487 regulate how rapidly hydrologic connectivity increases as system wetness evolves, and which



488 pathways dominate once critical states are approached (McDonnell, 2013; McGuire and  
489 McDonnell, 2010; Saffarpour et al., 2016).

490 In this structurally constrained context, ~~the mechanism reorganizations observed in Section~~  
491 ~~3.4 exhibit a pronounced directional tendency under increasing wetness.~~ Responses most  
492 commonly evolve from HOF to SOF, and subsequently to SSF or GWF. This tendency  
493 corresponds to the sequential activation of connectivity pathways as storage elements fill—from  
494 surface runoff with limited storage, to saturation-driven overland flow, and ultimately to lateral  
495 and vertical subsurface transmission once internal hydraulic linkages are established (Blöschl,  
496 2022; Cain et al., 2022; Lana-Renault et al., 2013; Saffarpour et al., 2016; Schnabel and Gómez-  
497 Gutiérrez, 2013). However, mechanisms frequently coexist, and dominance may shift gradually  
498 rather than abruptly, with alternative pathways emerging due to structural features like soil pipes  
499 or highly conductive bedrock.

500 ~~By linking threshold behavior to structural constraints on connectivity evolution, this~~  
501 ~~synthesis moves beyond merely documenting when specific runoff mechanisms occur. It clarifies~~  
502 ~~how mechanism dominance reorganizes along wetness gradients, explaining why similar forcing~~  
503 ~~leads to divergent nonlinear responses across landscapes.~~ Threshold differences across  
504 mechanisms and catchments arise not from fundamentally different rainfall controls but from  
505 how structural attributes translate state variables into connectivity gains and pathway activation,  
506 providing a unifying explanation for the diversity of threshold behavior in the literature.

507 ~~It should be noted that humid catchments are overrepresented in the reviewed dataset,~~  
508 ~~potentially biasing the apparent dominance of subsurface and groundwater transitions.~~ While  
509 directional reorganization remains evident within individual aridity classes, the limited number  
510 of arid and semi-arid systems constrains generalization toward strongly Hortonian environments.

#### 511 **4.3 A revised conceptual framework for storm runoff generation**

512 Building on the global synthesis of thresholds, ~~mechanism distribution~~, transition pathways,  
513 and soil–geology fingerprints, we propose a revised conceptual framework for storm runoff  
514 generation that integrates structure, state, and mechanism within a connectivity-based  
515 perspective (Fig. 9). In this framework, runoff thresholds are not fixed hydrologic constants, but  
516 emergent properties arising from dynamic interactions between rainfall forcing, evolving



517 catchment states, and relatively stable structural constraints (Genxu et al., 2017; Graham et al.,  
 518 2010; Ross et al., 2021; Wang et al., 2022b; Wilson et al., 2017; Zimmermann et al., 2014).

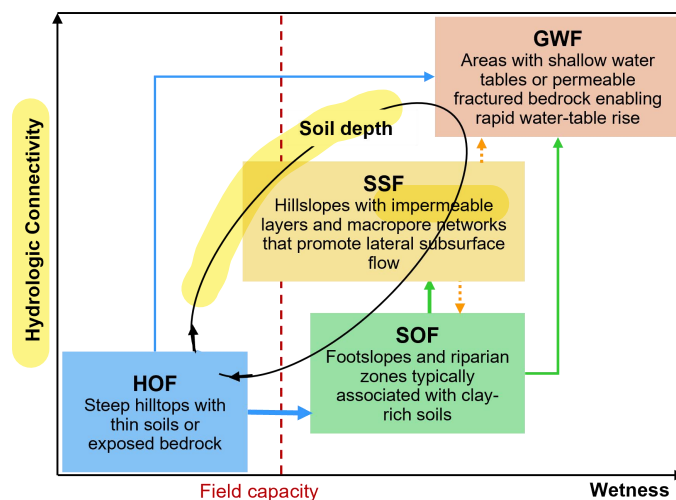

519

520 **Figure 9.** Conceptual framework of storm runoff generation across gradients of wetness and  
 521 hydrologic connectivity. Solid arrows indicate commonly observed transition pathways between  
 522 mechanisms as rainfall input and antecedent wetness increase, with arrow thickness representing  
 523 the relative likelihood of transition. Dashed arrows denote less frequent but plausible transitions,  
 524 highlighting alternative evolutionary pathways under specific structural or hydrologic conditions.  
 525 The red dashed line marks the "field capacity" threshold, where soil retains ~~its maximum~~ water  
 526 without significant drainage, marking the transition from soil moisture storage to runoff initiation.

527 Hydrologic connectivity serves as the central mediator linking structure, state, and runoff  
 528 response. Catchment structure—defined by soil depth, texture, permeability contrasts, lithology,  
 529 and geological architecture—constrains the pathways through which water can ~~be stored and~~  
 530 transmitted, thereby defining the space within which connectivity evolves (Ali and Roy, 2010;  
 531 Blume and Van Meerveld, 2015; Wilson et al., 2017). While structural attributes evolve slowly  
 532 relative to storm events, they exert primary control on runoff sensitivity to wetness changes.

533 State variables, including soil moisture, catchment storage, and groundwater level, describe  
 534 the catchment's evolving position within this structurally constrained space. As wetness increases,  
 535 storage elements fill and hydraulic linkages strengthen, activating new flow pathways. Nonlinear  
 536 runoff responses arise when incremental rainfall produces disproportionate increases in  
 537 connectivity, leading to the ~~reorganization of~~ flow pathways rather than gradual amplification of  
 538 existing ones (Cui et al., 2024; Hrachowitz et al., 2013; Lehmann et al., 2007; Tromp-van



539 Meerveld and McDonnell, 2006a, b; Zhang et al., 2021). In this context, thresholds mark  
540 connectivity transitions, with state variables serving as indicators of proximity to regime shifts  
541 rather than independent controls.

542 In this connectivity-based framework, runoff generation mechanisms are better understood  
543 as dynamic states rather than static, mutually exclusive categories. The transitions identified in  
544 this study—commonly from HOF to SOF, then to SSF or GWF—represent preferred but non-  
545 deterministic evolutionary pathways as wetness increases (Buttle et al., 2004; Cain et al., 2022;  
546 Haga et al., 2005; Latron and Gallart, 2008; Rogger et al., 2012). Structural heterogeneity,  
547 preferential flow networks, and subsurface drainage can modify or bypass these pathways,  
548 explaining why alternative transition sequences occur under similar forcing conditions.

549 Rainfall remains a necessary trigger for stormflow generation but does not solely determine  
550 runoff response. Identical rainfall events can induce negligible runoff or abrupt regime shifts  
551 depending on antecedent wetness and subsurface connectivity, reconciling the use of rainfall-  
552 based and composite threshold indicators with consistent evidence that internal state is key to  
553 explaining nonlinear behavior (Cain et al., 2022; Jin et al., 2020; Lee and Kim, 2020; McMillan  
554 and Srinivasan, 2015; Nanda and Safeeq, 2023; Redding and Devito, 2008; Williams et al.,  
555 2019). Thus, thresholds reflect occurrence conditions—specific combinations of triggering  
556 rainfall and internal state—rather than intrinsic properties of rainfall alone.

557 This revised framework advances our understanding of storm runoff generation in three key  
558 ways. First, it clarifies that cross-catchment comparability of runoff thresholds lies in  
559 connectivity transitions, not specific threshold values or variables. Second, it demonstrates that  
560 dominant runoff mechanisms undergo systematic but non-deterministic reorganization along  
561 wetness gradients, driven by structurally constrained connectivity evolution rather than rainfall  
562 forcing alone. Third, it provides a physically grounded synthesis that integrates event-scale  
563 threshold detection with established process-based runoff generation classifications. By  
564 conceptualizing nonlinear runoff responses as emergent connectivity within structurally  
565 constrained landscapes, the framework facilitates more coherent global comparisons, guides  
566 future observations to jointly resolve state dynamics and subsurface structure, and enhances the  
567 representation of threshold behavior in hydrological models.

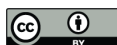

568 To extend this conceptual framework into hydrological modeling, we propose  
569 parameterizing connectivity transitions with state-dependent switching functions. These  
570 functions activate alternative flow pathways when soil storage or groundwater level exceeds  
571 critical fractions of maximum capacity, allowing models to simulate abrupt runoff amplification  
572 without fixed rainfall thresholds. This approach enables hydrological models to better represent  
573 the dynamic, state-dependent nature of runoff behavior, providing a more flexible and accurate  
574 depiction of threshold behavior.

## 575 **5. Conclusions**

576 This study synthesizes storm runoff threshold behavior across diverse experimental  
577 catchments by ~~examining event-scale observations,~~ threshold indicators, ~~dominant runoff~~  
578 ~~generation mechanisms,~~ and soil-geological context. Our findings ~~demonstrate~~ that runoff  
579 ~~thresholds are not fixed hydrologic constants, but~~ emergent properties resulting from the  
580 interactions between rainfall forcing, evolving catchment states, and relatively stable structural  
581 constraints. Apparent inconsistencies among reported threshold variables do not reflect  
582 contradictory hydrologic behavior, but arise from differences in observational focus and the  
583 connectivity pathways that dominate runoff generation. Thus, meaningful cross-catchment  
584 comparison lies in identifying common connectivity transitions rather than comparing specific  
585 threshold metrics.

586 Across climates and landscapes, antecedent state variables ~~consistently provide stronger~~  
587 ~~explanatory power for~~ nonlinear runoff responses than rainfall-based descriptors, indicating that  
588 threshold behavior is fundamentally state-controlled and rainfall-triggered. By synthesizing  
589 reported mechanism transitions, this study reveals a systematic ~~reorganization~~ of runoff  
590 generation with increasing wetness, where responses commonly shift from surface-dominated  
591 processes to subsurface- and groundwater-dominated pathways. These transitions reflect the  
592 progressive strengthening of hydrologic connectivity, driven by soil depth, permeability contrasts,  
593 subsurface architecture, and groundwater configuration, rather than rainfall forcing alone.

594  By ~~disentangling triggering conditions, dynamic states, and structural controls and linking~~  
595 ~~threshold indicators with shifts in dominant runoff mechanisms.~~ This study establishes a unified,  
596 ~~connectivity-based conceptual framework for storm runoff generation.~~ Rather than pursuing

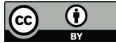

~~597 universal threshold values, comparative hydrology should focus on recurrent rainfall state  
598 structure configurations that regulate connectivity and regime shifts. This approach provides a  
599 robust, physically grounded foundation for interpreting nonlinear runoff behavior across  
600 catchments and underscores the need for future observational and modeling efforts to jointly  
601 resolve subsurface structure, evolving connectivity, and state dynamics in understanding and  
602 representing runoff thresholds.~~

~~603 To enhance the representation of runoff thresholds in future studies, field observations  
604 should prioritize high-frequency measurements of soil moisture profiles, groundwater levels near  
605 hillslope riparian interfaces, and indicators of subsurface connectivity. These observations  
606 should complement traditional rainfall metrics, providing a more comprehensive understanding  
607 of the dynamic processes driving runoff generation.~~

## 608 **Data availability**

609 The compiled catchment dataset used in this study will be archived in the Zenodo repository  
610 and made publicly available upon publication of the manuscript. The dataset link and DOI will  
611 be provided after acceptance.

## 612 **Author contribution**

613 ZC contributed the conceptualization, formal analysis, investigation and writing; FT  
614 contributed the conceptualization, formal analysis and revision.

## 615 **Competing interests**

616 Fuqiang Tian is a member of the editorial board of Hydrology and Earth System Sciences.

## 617 **Financial support**

618 This study was supported by the National Natural Science Foundation of China (U2442201)  
619 and the National Natural Science Foundation of China (52409031).



## 620 References

- 621 Ali, G., Tetzlaff, D., McDonnell, J. J., Soulsby, C., Carey, S., Laudon, H., McGuire, K., Buttle, J.,  
622 Seibert, J., and Shanley, J.: Comparison of threshold hydrologic response across northern  
623 catchments, *Hydrological Processes*, 29, 3575–3591, <https://doi.org/10.1002/hyp.10527>,  
624 2015.
- 625 Ali, G. A. and Roy, A. G.: Shopping for hydrologically representative connectivity metrics in a  
626 humid temperate forested catchment, *Water Resources Research*, 46, 2010WR009442,  
627 <https://doi.org/10.1029/2010WR009442>, 2010.
- 628 Ares, M. G., Varni, M., and Chagas, C.: Runoff response of a small agricultural basin in the  
629 argentine Pampas considering connectivity aspects, *Hydrological Processes*, 34, 3102–3119,  
630 <https://doi.org/10.1002/hyp.13782>, 2020.
- 631 Birch, A. L., Stallard, R. F., and Barnard, H. R.: Precipitation Characteristics and Land Cover  
632 Control Wet Season Runoff Source and Rainfall Partitioning in Three Humid Tropical  
633 Catchments in Central Panama, *Water Resources Research*, 57,  
634 <https://doi.org/10.1029/2020wr028058>, 2021.
- 635 Birkel, C., Broder, T., and Biester, H.: Nonlinear and threshold-dominated runoff generation  
636 controls DOC export in a small peat catchment, *JGR Biogeosciences*, 122, 498–513,  
637 <https://doi.org/10.1002/2016JG003621>, 2017.
- 638 Blöschl, G.: Flood generation: process patterns from the raindrop to the ocean, *Hydrol. Earth  
639 Syst. Sci.*, 26, 2469–2480, <https://doi.org/10.5194/hess-26-2469-2022>, 2022.
- 640 Blume, T. and Van Meerveld, H. J. (Ilja): From hillslope to stream: methods to investigate  
641 subsurface connectivity, *WIREs Water*, 2, 177–198, <https://doi.org/10.1002/wat2.1071>,  
642 2015.
- 643 Buttle, J. M., Dillon, P. J., and Eerkes, G. R.: Hydrologic coupling of slopes, riparian zones and  
644 streams: an example from the Canadian Shield, *Journal of Hydrology*, 287, 161–177,  
645 <https://doi.org/10.1016/j.jhydrol.2003.09.022>, 2004.
- 646 Cain, M. R., Woo, D. K., Kumar, P., Keefer, L., and Ward, A. S.: Antecedent Conditions Control  
647 Thresholds of Tile-Runoff Generation and Nitrogen Export in Intensively Managed  
648 Landscapes, *Water Resources Research*, 58, e2021WR030507,  
649 <https://doi.org/10.1029/2021WR030507>, 2022.
- 650 Camporese, M., Penna, D., Borga, M., and Paniconi, C.: A field and modeling study of nonlinear  
651 storage-discharge dynamics for an Alpine headwater catchment: NONLINEAR STORAGE-  
652 DISCHARGE DYNAMICS OF AN ALPINE CATCHMENT, *Water Resour. Res.*, 50,  
653 806–822, <https://doi.org/10.1002/2013WR013604>, 2014.
- 654 Chappell, N. A., Jones, T. D., Tych, W., and Krishnaswamy, J.: Role of rainstorm intensity  
655 underestimated by data-derived flood model s: Emerging global evidence from subsurface-  
656 dominated watersheds, *Environmental Modelling & Software*, 88, 1–9,  
657 <https://doi.org/10.1016/j.envsoft.2016.10.009>, 2017.
- 658 Cui, Z., Tian, F., Zhao, Z., Xu, Z., Duan, Y., Wen, J., and Khan, M. Y. A.: Bimodal hydrographs  
659 in a semi-humid forested watershed: characteristics and occurrence conditions, *Hydrol.  
660 Earth Syst. Sci.*, 28, 3613–3632, <https://doi.org/10.5194/hess-28-3613-2024>, 2024.
- 661 Cuomo, A. and Guida, D.: Using hydro-chemograph analyses to reveal runoff generation  
662 processes in a Mediterranean catchment, *Hydrol. Process.*, 30, 4462–4476,  
663 <https://doi.org/10.1002/hyp.10935>, 2016.

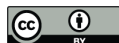

- 664 Deng, C., Jiang, X., Tan, Z., and Nie, T.: Spatiotemporal variation of hydrological connectivity  
665 and its threshold effects on flood dynamics: An examination in the arid and semi-arid  
666 regions, China, *Science of The Total Environment*, 935, 173406,  
667 <https://doi.org/10.1016/j.scitotenv.2024.173406>, 2024.
- 668 Detty, J. M. and McGuire, K. J.: Threshold changes in storm runoff generation at a till-mantled  
669 headwater catchment, *Water Resources Research*, 46, 2009WR008102,  
670 <https://doi.org/10.1029/2009WR008102>, 2010.
- 671 Douinot, A., Iffly, J. F., Tailliez, C., Meisch, C., and Pfister, L.: Flood patterns in a catchment  
672 with mixed bedrock geology and a hilly landscape: identification of flashy runoff  
673 contributions during storm events, *Hydrol. Earth Syst. Sci.*, 26, 5185–5206,  
674 <https://doi.org/10.5194/hess-26-5185-2022>, 2022.
- 675 Frei, S., Lischeid, G., and Fleckenstein, J. H.: Effects of micro-topography on surface–  
676 subsurface exchange and runoff generation in a virtual riparian wetland — A modeling  
677 study, *Advances in Water Resources*, 33, 1388–1401,  
678 <https://doi.org/10.1016/j.advwatres.2010.07.006>, 2010.
- 679 von Freyberg, J., Radny, D., Gall, H. E., and Schirmer, M.: Implications of hydrologic  
680 connectivity between hillslopes and riparian zones on streamflow composition, *Journal of*  
681 *Contaminant Hydrology*, 169, 62–74, <https://doi.org/10.1016/j.jconhyd.2014.07.005>, 2014.
- 682 Fu, C., Chen, J., Jiang, H., and Dong, L.: Threshold behavior in a fissured granitic catchment in  
683 southern China: 1. Analysis of field monitoring results, *Water Resources Research*, 49,  
684 2519–2535, <https://doi.org/10.1002/wrcr.20191>, 2013.
- 685 Gao, H., Ju, Q., Zhang, D., Wang, Z., Hao, Z., and Kirchner, J. W.: Quantifying Dynamic  
686 Linkages Between Precipitation, Groundwater Recharge, and Runoff using Ensemble  
687 Rainfall-Runoff Analysis, <https://doi.org/10.22541/essoar.171535928.81911940/v1>, 10 May  
688 2024.
- 689 Genxu, W., Tianxu, M., Juan, C., Chunlin, S., and Kewei, H.: Processes of runoff generation  
690 operating during the spring and autumn seasons in a permafrost catchment on semi-arid  
691 plateaus, *Journal of Hydrology*, 550, 307–317, <https://doi.org/10.1016/j.jhydrol.2017.05.020>,  
692 2017.
- 693 Graeff, T., Zehe, E., Reusser, D., Lück, E., Schröder, B., Wenk, G., John, H., and Bronstert, A.:  
694 Process identification through rejection of model structures in a mid-mountainous rural  
695 catchment: observations of rainfall-runoff response, geophysical conditions and model  
696 inter-comparison, *Hydrol. Process.*, 23, 702–718, <https://doi.org/10.1002/hyp.7171>, 2009.
- 697 Graham, C. B., Woods, R. A., and McDonnell, J. J.: Hillslope threshold response to rainfall: (1)  
698 A field based forensic approach, *Journal of Hydrology*, 393, 65–76,  
699 <https://doi.org/10.1016/j.jhydrol.2009.12.015>, 2010.
- 700 Green, D. I. S. and Crumpton, W. G.: Depressional runoff cascade networks of the Des Moines  
701 Lobe of Iowa, *JAWRA Journal of the American Water Resources Association*, 59, 824–854,  
702 <https://doi.org/10.1111/1752-1688.13103>, 2023.
- 703 Haga, H., Matsumoto, Y., Matsutani, J., Fujita, M., Nishida, K., and Sakamoto, Y.: Flow paths,  
704 rainfall properties, and antecedent soil moisture controlling lags to peak discharge in a  
705 granitic unchanneled catchment, *Water Resources Research*, 41, 2005WR004236,  
706 <https://doi.org/10.1029/2005WR004236>, 2005.
- 707 Hrachowitz, M., Savenije, H. H. G., Blöschl, G., McDonnell, J. J., Sivapalan, M., Pomeroy, J.  
708 W., Arheimer, B., Blume, T., Clark, M. P., Ehret, U., Fenicia, F., Freer, J. E., Gelfan, A.,

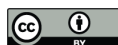

- 709 Gupta, H. V., Hughes, D. A., Hut, R. W., Montanari, A., Pande, S., Tetzlaff, D., Troch, P.  
710 A., Uhlenbrook, S., Wagener, T., Winsemius, H. C., Woods, R. A., Zehe, E., and Cudennec,  
711 C.: A decade of Predictions in Ungauged Basins (PUB)—a review, *Hydrological Sciences*  
712 *Journal*, 58, 1198–1255, <https://doi.org/10.1080/02626667.2013.803183>, 2013.
- 713 James, A. L. and Roulet, N. T.: Investigating hydrologic connectivity and its association with  
714 threshold change in runoff response in a temperate forested watershed, *Hydrological*  
715 *Processes*, 21, 3391–3408, <https://doi.org/10.1002/hyp.6554>, 2007.
- 716 Jehn, F. U., Breuer, L., Kraft, P., Bestian, K., and Houska, T.: Simple Catchments and Where to  
717 Find Them: The Storage-Discharge Relationship as a Proxy for Catchment Complexity,  
718 *Frontiers in Water*, 3, <https://doi.org/10.3389/frwa.2021.631651>, 2021.
- 719 Jin, Z., Guo, L., Yu, Y., Luo, D., Fan, B., and Chu, G.: Storm runoff generation in headwater  
720 catchments on the Chinese Loess Plateau after long-term vegetation rehabilitation, *Science*  
721 *of The Total Environment*, 748, 141375, <https://doi.org/10.1016/j.scitotenv.2020.141375>,  
722 2020.
- 723 Kampf, S. K., Faulconer, J., Shaw, J. R., Lefsky, M., Wagenbrenner, J. W., and Cooper, D. J.:  
724 Rainfall Thresholds for Flow Generation in Desert Ephemeral Streams, *Water Resources*  
725 *Research*, 54, 9935–9950, <https://doi.org/10.1029/2018WR023714>, 2018.
- 726 Kirchner, J. W.: Characterizing nonlinear, nonstationary, and heterogeneous hydrologic behavior  
727 using ensemble rainfall–runoff analysis (ERRA): proof of concept, *Hydrol. Earth Syst. Sci.*,  
728 28, 4427–4454, <https://doi.org/10.5194/hess-28-4427-2024>, 2024.
- 729 Lana-Renault, N., Nadal-Romero, E., Serrano-Muela, M. P., Alvera, B., Sánchez-Navarrete, P.,  
730 Sanjuan, Y., and García-Ruiz, J. M.: Comparative analysis of the response of various land  
731 covers to an exceptional rainfall event in the central Spanish Pyrenees, October 2012, *Earth*  
732 *Surf Processes Landf*, 39, 581–592, <https://doi.org/10.1002/esp.3465>, 2013.
- 733 Latron, J. and Gallart, F.: Runoff generation processes in a small Mediterranean research  
734 catchment (Vallcebre, Eastern Pyrenees), *Journal of Hydrology*, 358, 206–220,  
735 <https://doi.org/10.1016/j.jhydrol.2008.06.014>, 2008.
- 736 Lee, E. and Kim, S.: Characterization of runoff generation in a mountainous hillslope according  
737 to multiple threshold behavior and hysteretic loop features, *Journal of Hydrology*, 590,  
738 125534, <https://doi.org/10.1016/j.jhydrol.2020.125534>, 2020.
- 739 Lehmann, P., Hinz, C., McGrath, G., Meerveld, H. J. T., and McDonnell, J. J.: Rainfall threshold  
740 for hillslope outflow: an emergent property of flow pathway connectivity, *Hydrol. Earth*  
741 *Syst. Sci.*, 2007.
- 742 Liu, T., McGuire, L. A., Oakley, N., and Cannon, F.: Temporal changes in rainfall intensity–  
743 duration thresholds for post-wildfire flash floods in southern California, *Nat. Hazards Earth*  
744 *Syst. Sci.*, 22, 361–376, <https://doi.org/10.5194/nhess-22-361-2022>, 2022.
- 745 Martínez-Carreras, N., Hissler, C., Gourdol, L., Klaus, J., Juilleret, J., Iffly, J. F., and Pfister, L.:  
746 Storage controls on the generation of double peak hydrographs in a forested headwater  
747 catchment, *Journal of Hydrology*, 543, 255–269,  
748 <https://doi.org/10.1016/j.jhydrol.2016.10.004>, 2016.
- 749 McDonnell, J. J.: Are all runoff processes the same?, *Hydrological Processes*, 27, 4103–4111,  
750 <https://doi.org/10.1002/hyp.10076>, 2013.
- 751 McGuire, K. J. and McDonnell, J. J.: Hydrological connectivity of hillslopes and streams:  
752 Characteristic time scales and nonlinearities, *Water Resources Research*, 46,  
753 2010WR009341, <https://doi.org/10.1029/2010WR009341>, 2010.



- 754 McMillan, H., Araki, R., Bolotin, L., Kim, D.-H., Coxon, G., Clark, M., and Seibert, J.: Global  
755 patterns in observed hydrologic processes, *Nat Water*, 3, 497–506,  
756 <https://doi.org/10.1038/s44221-025-00407-w>, 2025.
- 757 McMillan, H. K. and Srinivasan, M. S.: Characteristics and controls of variability in soil  
758 moisture and groundwater in a headwater catchment, *Hydrol. Earth Syst. Sci.*, 19, 1767–  
759 1786, <https://doi.org/10.5194/hess-19-1767-2015>, 2015.
- 760 Mentzafou, A., Papadopoulos, A., and Dimitriou, E.: Flood generating mechanisms investigation  
761 and rainfall threshold identification for regional flood early warning, *Environ Earth Sci*, 82,  
762 242, <https://doi.org/10.1007/s12665-023-10938-8>, 2023.
- 763 Meyles, E., Williams, A., Ternan, L., and Dowd, J.: Runoff generation in relation to soil  
764 moisture patterns in a small Dartmoor catchment, Southwest England, *Hydrological  
765 Processes*, 17, 251–264, <https://doi.org/10.1002/hyp.1122>, 2003.
- 766 Mirus, B. B. and Loague, K.: How runoff begins (and ends): Characterizing hydrologic response  
767 at the catchment scale, *Water Resources Research*, 49, 2987–3006,  
768 <https://doi.org/10.1002/wrcr.20218>, 2013.
- 769 Nanda, A. and Safeeq, M.: Threshold controlling runoff generation mechanisms in  
770 Mediterranean headwater catchments, *Journal of Hydrology*, 620, 129532,  
771 <https://doi.org/10.1016/j.jhydrol.2023.129532>, 2023.
- 772 Nanda, A. and Sen, S.: A complex network theory based approach to better understand the  
773 infiltration-excess runoff generation thresholds, *Journal of Hydrology*, 603, 127038,  
774 <https://doi.org/10.1016/j.jhydrol.2021.127038>, 2021.
- 775 Patankou, P., Tesarm, M., and Ák, Í. J. P. ˇ: Instability driven flow and runoff formation in a  
776 small catchment, <https://doi.org/10.1344/105.000001435>, 2004.
- 777 Penna, D., van-Meerveld, H. J. T., Gobbi, A., and Borga, M.: Non-linearity of runoff generation  
778 processes in an alpine headwater catchment, 2010.
- 779 Penna, D., Tromp-van Meerveld, H. J., Gobbi, A., Borga, M., and Dalla Fontana, G.: The  
780 influence of soil moisture on threshold runoff generation processes in an alpine headwater  
781 catchment, *Hydrol. Earth Syst. Sci.*, 15, 689–702, <https://doi.org/10.5194/hess-15-689-2011>,  
782 2011.
- 783 Redding, T. E. and Devito, K. J.: Lateral flow thresholds for aspen forested hillslopes on the  
784 Western Boreal Plain, Alberta, Canada, *Hydrological Processes*, 22, 4287–4300,  
785 <https://doi.org/10.1002/hyp.7038>, 2008.
- 786 Rogger, M., Pirkel, H., Viglione, A., Komma, J., Kohl, B., Kirnbauer, R., Merz, R., and Blöschl,  
787 G.: Step changes in the flood frequency curve: Process controls, *Water Resources Research*,  
788 48, <https://doi.org/10.1029/2011wr011187>, 2012.
- 789 Ross, C. A., Ali, G. A., Spence, C., and Courchesne, F.: Evaluating the Ubiquity of Thresholds  
790 in Rainfall-Runoff Response Across Contrasting Environments, *Water Resources Research*,  
791 57, e2020WR027498, <https://doi.org/10.1029/2020WR027498>, 2021.
- 792 Ruggenthaler, R., Schöberl, F., Markart, G., Klebinder, K., Hammerle, A., and Leitinger, G.:  
793 Quantification of Soil Moisture Effects on Runoff Formation at the Hillslope Scale, *J. Irrig.  
794 Drain Eng.*, 141, 05015001, [https://doi.org/10.1061/\(ASCE\)IR.1943-4774.0000880](https://doi.org/10.1061/(ASCE)IR.1943-4774.0000880), 2015.
- 795 Saffarpour, S., Western, A. W., Adams, R., and McDonnell, J. J.: Multiple runoff processes and  
796 multiple thresholds control agricultural runoff generation, *Hydrol. Earth Syst. Sci.*, 20,  
797 4525–4545, <https://doi.org/10.5194/hess-20-4525-2016>, 2016.



- 798 Sahraei, A., Kraft, P., Windhorst, D., and Breuer, L.: High-Resolution, In Situ Monitoring of  
799 Stable Isotopes of Water Revealed Insight into Hydrological Response Behavior, *Water*, 12,  
800 565, <https://doi.org/10.3390/w12020565>, 2020.
- 801 Scaife, C. I., Singh, N. K., Emanuel, R. E., Miniati, C. F., and Band, L. E.: Non-linear quickflow  
802 response as indicators of runoff generation mechanisms, *Hydrological Processes*, 34, 2949–  
803 2964, <https://doi.org/10.1002/hyp.13780>, 2020.
- 804 Schnabel, S. and Gómez-Gutiérrez, A.: The role of interannual rainfall variability on runoff  
805 generation in a small dry sub-humid watershed with disperse tree cover, *CIG*, 39, 259–285,  
806 <https://doi.org/10.18172/cig.1991>, 2013.
- 807 Sidle, R. C., Tsuboyama, Y., Noguchi, S., Hosoda, I., Fujieda, M., and Shimizu, T.: Stormflow  
808 generation in steep forested headwaters: a linked hydrogeomorphic paradigm, *Hydrol.*  
809 *Process.*, 14, 369–385, [https://doi.org/10.1002/\(SICI\)1099-1085\(20000228\)14:3%253C369::AID-HYP943%253E3.0.CO;2-P](https://doi.org/10.1002/(SICI)1099-1085(20000228)14:3%253C369::AID-HYP943%253E3.0.CO;2-P), 2000.
- 811 Steenhuis, T. S., Hrnčíř, M., Poteau, D., Romero Luna, E. J., Tilahun, S. A., Caballero, L. A.,  
812 Guzman, C. D., Stoof, C. R., Šanda, M., Yitaferu, B., and Císlarová, M.: A Saturated  
813 Excess Runoff Pedotransfer Function for Vegetated Watersheds, *Vadose Zone Journal*, 12,  
814 1–10, <https://doi.org/10.2136/vzj2013.03.0060>, 2013.
- 815 Tromp-van Meerveld, H. J. and McDonnell, J. J.: Threshold relations in subsurface stormflow: 1.  
816 A 147-storm analysis of the Panola hillslope, *Water Resources Research*, 42,  
817 2004WR003778, <https://doi.org/10.1029/2004WR003778>, 2006a.
- 818 Tromp-van Meerveld, H. J. and McDonnell, J. J.: Threshold relations in subsurface stormflow: 2.  
819 The fill and spill hypothesis, *Water Resources Research*, 42, 2004WR003800,  
820 <https://doi.org/10.1029/2004WR003800>, 2006b.
- 821 Wang, S., Yan, Y., Fu, Z., and Chen, H.: Rainfall-runoff characteristics and their threshold  
822 behaviors on a karst hillslope in a peak-cluster depression region, *Journal of Hydrology*,  
823 605, 127370, <https://doi.org/10.1016/j.jhydrol.2021.127370>, 2022a.
- 824 Wang, Y., Gao, L., Huang, S., and Peng, X.: Combined effects of rainfall types and antecedent  
825 soil moisture on runoff generation at a hillslope of red soil region, *European J Soil Science*,  
826 73, e13274, <https://doi.org/10.1111/ejss.13274>, 2022b.
- 827 Williams, M. R., Livingston, S. J., Heathman, G. C., and McAfee, S. J.: Thresholds for run-off  
828 generation in a drained closed depression, *Hydrological Processes*, 33, 2408–2421,  
829 <https://doi.org/10.1002/hyp.13477>, 2019.
- 830 Wilson, G. V., Nieber, J. L., Fox, G. A., Dabney, S. M., Ursic, M., and Rigby, J. R.: Hydrologic  
831 connectivity and threshold behavior of hillslopes with fragipans and soil pipe networks,  
832 *Hydrological Processes*, 31, 2477–2496, <https://doi.org/10.1002/hyp.11212>, 2017.
- 833 Ye, S., Liu, L., Li, J., Pan, H., Li, W., and Ran, Q.: From rainfall to runoff: The role of soil  
834 moisture in a mountainous catchment, *Journal of Hydrology*, 625, 130060,  
835 <https://doi.org/10.1016/j.jhydrol.2023.130060>, 2023.
- 836 Zehe, E., Elsenbeer, H., Lindenmaier, F., Schulz, K., and Blöschl, G.: Patterns of predictability  
837 in hydrological threshold systems, *Water Resources Research*, 43,  
838 <https://doi.org/10.1029/2006wr005589>, 2007.
- 839 Zhang, G., Cui, P., Gualtieri, C., Zhang, J., Ahmed Bazai, N., Zhang, Z., Wang, J., Tang, J.,  
840 Chen, R., and Lei, M.: Stormflow generation in a humid forest watershed controlled by  
841 antecedent wetness and rainfall amounts, *Journal of Hydrology*, 603, 127107,  
842 <https://doi.org/10.1016/j.jhydrol.2021.127107>, 2021.

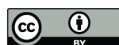

843 Zillgens, B., Merz, B., Kirnbauer, R., and Tilch, N.: Analysis of the runoff response of an alpine  
844 catchment at different scales, *Hydrol. Earth Syst. Sci.*, 2007.  
845 Zimmermann, B., Zimmermann, A., Turner, B. L., Francke, T., and Elsenbeer, H.: Connectivity  
846 of overland flow by drainage network expansion in a rain forest catchment:  
847 CONNECTIVITY OF OVERLAND FLOW IN A RAINFOREST CATCHMENT, *Water*  
848 *Resour. Res.*, 50, 1457–1473, <https://doi.org/10.1002/2012WR012660>, 2014.  
849  
850



851 **Appendix A.**

852 **Table A1.** Simplified summary of watershed attributes and runoff generation mechanisms.

| Watershed        | Country            | Threshold variable | State variable | Dominant runoff generation mechanism |
|------------------|--------------------|--------------------|----------------|--------------------------------------|
| ARW              | India              | Pi                 | AMC            | HOF                                  |
| Izas             | Spain              | -                  | -              | HOF                                  |
| LCC              | Italy              | -                  | AMC            | SOF                                  |
| Andit Tid        | Ethiopia           | P                  | AMC            | SOF                                  |
| Anjeni           | Ethiopia           | P                  | AMC            | SOF                                  |
| La Tigra         | Honduras           | P                  | AMC            | SOF & SSF                            |
| Lake Enriqueillo | Dominican Republic | P                  | AMC            | SOF                                  |
| Lake Saumatre    | Haiti              | P                  | AMC            | SOF                                  |
| Maybar           | Ethiopia           | P                  | AMC            | SOF                                  |
| Uhlířská         | Czech Republic     | P                  | AMC            | SOF & SSF                            |
| LMW              | USA                | SWC                | SWC & GWL      | SOF                                  |
| Saalach          | Austria            | -                  | AMC            | SSF                                  |
| USR              | USA                | ASI & P            | SWC & GWL      | SSF & GWF                            |
| XEW              | China              | ASI & P            | SWC & GWL      | GWF                                  |
| Plynlimon        | United Kingdom     | -                  | Storage        | SOF                                  |
| LGC              | New Zealand        | ASI & P            | ASW            | SOF                                  |
| Bongsunsa        | Korea              | ASI & P            | ASW            | SSF                                  |
| MSRB             | Japan              | API                | AMC            | SSF                                  |
| RRC              | USA                | -                  | AMC            | SSF                                  |
| FSSF             | Brazil             | -                  | ASW            | SOF & SSF                            |
| Yingtán          | China              | ASI & P            | ASW            | SOF                                  |
| Araguás          | Spain              | -                  | -              | HOF                                  |
| Arnás            | Spain              | -                  | AMC            | SOF & SSF                            |
| SSC              | Spain              | -                  | AMC            | SSF & GWF                            |
| Girnock          | UK                 | P                  | AMC            | SOF & SSF                            |
| HJA              | USA                | P                  | AMC            | SOF & SSF                            |

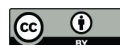

|                |                |           |           |           |
|----------------|----------------|-----------|-----------|-----------|
| Hubbard Brook  | USA            | P         | AMC       | SOF & SSF |
| Krycklan       | Sweden         | P         | AMC       | SOF & SSF |
| Mharcaidh      | UK             | P         | -         | SOF & SSF |
| Sleepers River | USA            | P         | AMC       | SOF & SSF |
| BBC            | United Kingdom | -         | Storage   | SOF       |
| Lutzito        | Panama         | Storage   | AMC       | SOF       |
| SNWR           | USA            | -         | AMC       | SOF & SSF |
| LEC            | Germany        | Storage   | Storage   | SOF       |
| CCW            | Canada         | P         | AMC       | SOF       |
| HRM            | Canada         | P         | AMC       | SOF & SSF |
| MRC            | New Zealand    | P         | AMC       | SOF & SSF |
| Baratz         | Italy          | SWC & GWL | SWC & GWL | SOF & SSF |
| Pinios         | Greece         | P         | -         | SOF       |
| HM             | Luxembourg     | -         | -         | SOF & SSF |
| KOE            | Luxembourg     | -         | AMC       | SOF & GWF |
| L1             | Japan          | ASI & P   | ASW       | SSF       |
| JPG            | China          | ASI & P   | ASW       | SSF       |
| SEO            | Germany        | -         | -         | SSF       |
| SIR            | Chile          | P         | SWC       | SOF       |
| Maimai         | New Zealand    | P         | -         | SSF       |
| Toro           | USA            | -         | -         | HOF & SOF |
| Utuaado        | USA            | -         | ASW       | SSF       |
| Uhlirska       | Czech Republic | -         | AMC       | SSF       |
| GCC            | France         | SWC       | ASW       | SSF       |
| C3             | USA            | -         | -         | SSF       |
| CB             | USA            | -         | -         | SSF       |
| R5             | USA            | -         | -         | HOF & SOF |
| TW             | Australia      | -         | AMC       | SOF       |
| GCEW           | USA            | ASI & P   | ASW       | SSF       |
| PC1-08         | Canada         | GWL       | GWL       | SOF & SSF |
| Marcell        | USA            | -         | ASW       | SOF & SSF |



|             |                |         |         |           |
|-------------|----------------|---------|---------|-----------|
| WS10        | USA            | P       | AMC     | SSF       |
| PLB         | Canada         | -       | AMC     | SSF       |
| PEC         | United Kingdom | -       | ASW     | SOF & SSF |
| URHB        | Switzerland    | P       | AMC     | SOF & SSF |
| Liz         | Czech Republic | SWC     | SWC     | SSF       |
| PSC         | USA            | P       | -       | SSF       |
| Westcreek   | Canada         | SWC     | SWC     | SSF       |
| URSA        | Canada         | ASI & P | ASW     | SSF       |
| Ponderosa   | USA            | SWC     | ASW     | SSF       |
| Hermine     | Canada         | Storage | Storage | SSF       |
| RBF         | Australia      | ASI & P | ASW     | SOF & SSF |
| Odersprung  | Germany        | GWL     | GWL     | SOF       |
| CHL         | USA            | ASI & P | ASW     | SSF       |
| SHW         | USA            | ASI & P | SWC     | GWF       |
| HOAL        | Austria        | SWC     | SWC     | SOF       |
| BEC         | Australia      | -       | GWL     | SSF       |
| Tannhausen  | Germany        | SWC     | SWC     | SOF       |
| Weiherbach  | Germany        | SWC     | ASW     | SSF       |
| RCRW        | Canada         | GWL     | AMC     | SSF       |
| Woldong     | Korea          | API     | AMC     | SSF       |
| ASW         | Panama         | -       | -       | SSF       |
| WWC         | Australia      | SWC     | SWC     | SOF & SSF |
| Schäfertal  | Germany        | -       | AMC     | GWF       |
| Fenghuoshan | China          | SWC     | SWC     | SOF & SSF |
| Inzing      | Austria        | SWC     | ASW     | SOF       |
| Mösern      | Austria        | SWC     | ASW     | SOF       |
| Yanglou     | China          | P       | AMC     | GWF       |
| MWYW        | USA            | Pi      | -       | HOF       |
| WGEW        | USA            | Pi      | -       | HOF       |
| Mulian      | China          | ASI & P | ASW     | SSF       |
| Corbeira    | Spain          | P       | AMC     | SSF       |



|            |                |         |         |           |
|------------|----------------|---------|---------|-----------|
| HRW        | Canada         | -       | -       | SOF & SSF |
| Baru       | Malaysia       | -       | -       | SSF       |
| Greenholes | United Kingdom | -       | -       | SSF       |
| Hafre      | United Kingdom | -       | -       | SSF       |
| NCB        | United Kingdom | -       | -       | SSF       |
| Saimane    | India          | -       | -       | SSF       |
| SCB        | Australia      | -       | -       | SSF       |
| UEC        | Czech Republic | P       | ASW     | SSF       |
| Alptal     | Switzerland    | -       | GWL     | SOF       |
| HMD        | UK             | SWC     | ASW     | SSF       |
| Ina        | Japan          | P       | AMC     | SSF & GWF |
| MNC        | Japan          | ASI & P | ASW     | SSF       |
| CVC        | Spain          | SWC     | SWC     | SOF       |
| AEB        | Brazil         | P       | -       | HOF       |
| VSC        | Argentina      | P       | AMC     | SSF       |
| Jiufeng    | China          | SWC     | ASW     | HOF       |
| Matalom    | Philippines    | P       | ASW     | SOF & SSF |
| Ressi      | Italy          | ASI & P | ASW     | SSF       |
| DFP        | USA            | SWC     | ASW     | SOF       |
| LZW        | Mexico         | SWC     | ASW     | SSF       |
| CRC        | Spain          | P       | AMC     | SOF       |
| Mahurangi  | New Zealand    | P       | ASW     | SOF & SSF |
| BCC        | Italy          | ASI & P | ASW     | SSF & GWF |
| WAWC       | Austria        | P       | Storage | SOF & SSF |
| Weierbach  | Luxembourg     | Storage | Storage | GWF       |
| Nanxiaohe  | China          | ASI & P | ASW     | HOF       |
| LXR        | China          | ASI & P | ASW     | SSF       |
| HOEW       | Japan          | API     | AMC     | SSF       |
| SDSC       | China          | ASI & P | ASW     | SSF       |
| GRC        | USA            | Storage | Storage | SSF       |
| SH         | USA            | SWC     | Storage | SOF & SSF |



|            |               |         |         |           |
|------------|---------------|---------|---------|-----------|
| TSF        | New Zealand   | -       | AMC     | SSF       |
| UASW       | USA           | Pi      | -       | HOF       |
| HEB        | Japan         | P       | -       | GWF       |
| MEW        | Côte d'Ivoire | -       | SWC     | SSF       |
| RDN        | Spain         | P       | -       | HOF       |
| RVB        | Italy         | SWC     | ASW     | SSF       |
| PEW        | Spain         | SWC     | ASW     | SOF & SSF |
| CERB       | China         | P       | ASW     | SSF       |
| WS3        | USA           | ASI & P | SWC     | SSF       |
| KREW       | USA           | ASI & P | ASW     | SSF       |
| PMRW       | USA           | P       | ASW     | SSF       |
| DCD        | USA           | ASI & P | AMC     | SSF       |
| UGCC       | Canada        | GWL     | SWC     | SSF       |
| Quinuas    | Ecuador       | SWC     | -       | SSF       |
| Ciciriello | Italy         | -       | ASW     | GWF       |
| OCR        | USA           | SWC     | -       | SSF       |
| UP1        | Canada        | Storage | Storage | SOF       |
| HBEF       | USA           | -       | ASW     | SOF & SSF |

---

853

854



855 **Table 2.** Synonym normalization of soil–geology descriptors used in the literature synthesis.

| Original terms reported in literature                                                                                | Standardized descriptor used in this study                 |
|----------------------------------------------------------------------------------------------------------------------|------------------------------------------------------------|
| shallow regolith, thin soils, shallow soils, shallow earth                                                           | shallow soil                                               |
| deep permeable soil, thick soil profile, thick organic matter layer, deep loess                                      | deep soil                                                  |
| high hydraulic conductivity, high infiltration capacity<br>low hydraulic conductivity<br>shallow impermeable horizon | high conductivity<br>low conductivity<br>impermeable layer |
| fractured bedrock, fractured rock, tectonic fracture, structural fracture, high fractures                            | fractured bedrock                                          |
| bedrock exposure, bare bedrock, exposed bedrock, rocky outcrops                                                      | rock outcrop                                               |
| shallow water table, shallow groundwater level, shallow water table depth<br>macropores, macroporous                 | shallow groundwater level<br>macropores                    |
| low permeability substrate, low-permeability layer, low permeability soils                                           | low permeability                                           |
| high permeability, highly permeable soils                                                                            | high permeability                                          |

856
